# Supplementary material for: Conflicting cerebrospinal fluid biomarkers and progression to dementia due to Alzheimer’s disease
Source: Springer Nature journal article supplement (doi:10.1186/s13195-016-0220-z), 2016-11-23

## ACKNOWLEDGEMENT LIST FOR ADNI PUBLICATIONS

The Data and Publications Committee, in keeping with the publication policies adopted by the ADNI Steering Committee, here provide lists for standardized acknowledgement. The list consists of two parts: I. ADNI Infrastructure Investigators and Site Investigators and II. DOD ADNI Infrastructure Investigators and Site Investigators. Infrastructure Investigators represent the names responsible for leadership and infrastructure. Site Investigators represent the names of individuals at each recruiting site. All papers, including methodological papers, should have an acknowledgement list that consists of Infrastructure Investigators plus the FULL list.

### I. ADNI I, GO and II

#### Part A: Leadership and Infrastructure

##### **Principal Investigator**

Michael W. Weiner, MD UC San Francisco

##### **ADCS PI and Director of Coordinating Center Clinical Core**

Paul Aisen, MD UC San Diego

##### **Executive Committee**

|                             |                                                     |
|-----------------------------|-----------------------------------------------------|
| Michael Weiner, MD          | UC San Francisco                                    |
| Paul Aisen, MD              | UC San Diego                                        |
| Ronald Petersen, MD, PhD    | Mayo Clinic, Rochester                              |
| Clifford R. Jack, Jr., MD   | Mayo Clinic, Rochester                              |
| William Jagust, MD          | UC Berkeley                                         |
| John Q. Trojanowki, MD, PhD | U Pennsylvania                                      |
| Arthur W. Toga, PhD         | USC                                                 |
| Laurel Beckett, PhD         | UC Davis                                            |
| Robert C. Green, MD, MPH    | Brigham and Women's Hospital/Harvard Medical School |
| Andrew J. Saykin, PsyD      | Indiana University                                  |
| John Morris, MD             | Washington University St. Louis                     |
| Leslie M. Shaw              | University of Pennsylvania                          |

##### **ADNI External Advisory Board (ESAB)**

|                         |                                                           |
|-------------------------|-----------------------------------------------------------|
| Zaven Khachaturian, PhD | Prevent Alzheimer's Disease 2020 (Chair)                  |
| Greg Sorensen, MD       | Siemens                                                   |
| Maria Carrillo, PhD     | Alzheimer's Association                                   |
| Lew Kuller, MD          | University of Pittsburg                                   |
| Marc Raichle, MD        | Washington University St. Louis                           |
| Steven Paul, MD         | Cornell University                                        |
| Peter Davies, MD        | Albert Einstein College of Medicine of Yeshiva University |
| Howard Fillit, MD       | AD Drug Discovery Foundation                              |
| Franz Hefti, PhD        | Acumen Pharmaceuticals                                    |
| Davie Holtzman, MD      | Washington University St. Louis                           |
| M. Marcel Mesulam, MD   | Northwestern University                                   |
| William Potter, MD      | National Institute of Mental Health                       |
| Peter Snyder, PhD       | Brown University                                          |

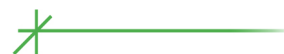

**ADNI 2 Private Partner Scientific Board (PPSB)**

Adam Schwartz, MD Eli Lilly (Chair)

**Data and Publication Committee (DPC)**

Robert C. Green, MD, MPH BWH/HMS (Chair)

**Resource Allocation Review Committee**

Tom Montine, MD, PhD University of Washington (Chair)

**Clinical Core Leaders**

Ronald Petersen, MD, PhD Mayo Clinic, Rochester (Core PI)  
Paul Aisen, MD UC San Diego

**Clinical Informatics and Operations**

Ronald G. Thomas, PhD UC San Diego  
Michael Donohue, PhD UC San Diego  
Sarah Walter, MSc UC San Diego  
Devon Gessert UC San Diego  
Tamie Sather, MA UC San Diego  
Gus Jiminez, MBS UC San Diego

**Biostatistics Core Leaders and Key Personnel**

Laurel Beckett, PhD UC Davis (Core PI)  
Danielle Harvey, PhD UC Davis  
Michael Donohue, PhD UC San Diego

**MRI Core Leaders and Key Personnel**

Clifford R. Jack, Jr., MD Mayo Clinic, Rochester (Core PI)  
Matthew Bernstein, PhD Mayo Clinic, Rochester  
Nick Fox, MD University of London  
Paul Thompson, PhD UCLA School of Medicine  
Norbert Schuff, PhD UCSF MRI  
Charles DeCarli, MD UC Davis  
Bret Borowski, RT Mayo Clinic  
Jeff Gunter, PhD Mayo Clinic  
Matt Senjem, MS Mayo Clinic  
Prashanthi Vemuri, PhD Mayo Clinic  
David Jones, MD Mayo Clinic  
Kejal Kantarci Mayo Clinic  
Chad Ward Mayo Clinic

**PET Core Leaders and Key Personnel**

William Jagust, MD UC Berkeley (Core PI)  
Robert A. Koeppe, PhD University of Michigan  
Norm Foster, MD University of Utah  
Eric M. Reiman, MD Banner Alzheimer's Institute  
Kewei Chen, PhD Banner Alzheimer's Institute



Chet Mathis, MD  
Susan Landau, PhD

University of Pittsburgh  
UC Berkeley

**Neuropathology Core Leaders**

John C. Morris, MD  
Nigel J. Cairns, PhD, MRCPATH  
Erin Householder  
Lisa Taylor-Reinwald, BA, HTL  
(ASCP) – Past Investigator

Washington University St. Louis  
Washington University St. Louis  
Washington University St. Louis  
Washington University St. Louis

**Biomarkers Core Leaders and Key Personnel**

Leslie M. Shaw, PhD  
John Q. Trojanowki, MD, PhD  
Virginia Lee, PhD, MBA  
Magdalena Korecka, PhD  
Michal Figurski, PhD

UPenn School of Medicine  
UPenn School of Medicine  
UPenn School of Medicine  
UPenn School of Medicine  
UPenn School of Medicine

**Informatics Core Leaders and Key Personnel**

Arthur W. Toga, PhD  
Karen Crawford  
Scott Neu, PhD

USC (Core PI)  
USC  
USC

**Genetics Core Leaders and Key Personnel**

Andrew J. Saykin, PsyD  
Tatiana M. Foroud, PhD  
Steven Potkin, MD UC  
Li Shen, PhD  
Kelley Faber, MS, CCRC  
Sungeun Kim, PhD  
Kwangsik Nho, PhD

Indiana University  
Indiana University  
UC Irvine  
Indiana University  
Indiana University  
Indiana University  
Indiana University

**Initial Concept Planning & Development**

Michael W. Weiner, MD  
Lean Thal, MD  
Zaven Khachaturian, PhD

UC San Francisco  
UC San Diego  
Prevent Alzheimer's Disease 2020

**Early Project Proposal Development**

Leon Thal, MD  
Neil Buckholtz  
Michael W. Weiner, MD  
Peter J. Snyder, PhD  
William Potter, MD  
Steven Paul, MD  
Marylyn Albert, PhD  
Richard Frank, MD, PhD  
Zaven Khachaturian, PhD

UC San Diego  
National Insitute on Aging  
UC San Francisco  
Brown University  
National Institute of Mental Health  
Cornell Universtiy  
Johns Hopkins University  
Richard Frank Consulting  
Prevent Alzheimer's Disease 2020



**NIA**

John Hsiao, MD

National Institute on Aging

**Part B: Investigators By Site**

**Oregon Health and Science University:**

Jeffrey Kaye, MD  
Joseph Quinn, MD  
Betty Lind, BS  
Raina Carter, BA  
Sara Dolen, BS – Past Investigator

**University of Southern California:**

Lon S. Schneider, MD  
Sonia Pawluczyk, MD  
Mauricio Beccera, BS  
Liberty Teodoro, RN  
Bryan M. Spann, DO, PhD – Past Investigator

**University of California--San Diego:**

James Brewer, MD, PhD  
Helen Vanderswag, RN  
Adam Fleisher, MD – Past Investigator

**University of Michigan:**

Judith L. Heidebrink, MD, MS  
Joanne L. Lord, LPN, BA, CCRC

**Mayo Clinic, Rochester:**

Ronald Petersen, MD, PhD  
Sara S. Mason, RN  
Colleen S. Albers, RN  
David Knopman, MD  
Kris Johnson, RN – Past Investigator

**Baylor College of Medicine:**

Rachelle S. Doody, MD, PhD  
Javier Villanueva-Meyer, MD  
Munir Chowdhury, MBBS, MS  
Susan Rountree, MD  
Mimi Dang, MD

**Columbia University Medical Center:**

Yaakov Stern, PhD  
Lawrence S. Honig, MD, PhD  
Karen L. Bell, MD

**Washington University, St. Louis:**

Beau Ances, MD  
John C. Morris, MD  
Maria Carroll, RN, MSN  
Sue Leon, RN, MSN  
Erin Householder, MS, CCRP  
Mark A. Mintun, MD – Past Investigator  
Stacy Schneider, APRN, BC, GNP – Past Investigator  
Angela Oliver, RN, BSN, MSG – Past Investigator

**University of Alabama - Birmingham:**

Daniel Marson, JD, PhD  
Randall Griffith, PhD, ABPP  
David Clark, MD  
David Geldmacher, MD  
John Brockington, MD  
Erik Roberson, MD

**Mount Sinai School of Medicine:**

Hillel Grossman, MD  
Effie Mitsis, PhD

**Rush University Medical Center:**

Leyla deToledo-Morrell, PhD  
Raj C. Shah, MD

**Wien Center:**

Ranjan Duara, MD  
Daniel Varon, MD  
Maria T. Greig, HP  
Peggy Roberts, CNA – Past Investigator

**Johns Hopkins University:**

Marilyn Albert, PhD  
Chiadi Onyike, MD  
Daniel D'Agostino II, BS  
Stephanie Kielb, BS – Past Investigator

**New York University:**

James E. Galvin, MD, MPH  
Dana M. Pogorelec  
Brittany Cerbone



Christina A. Michel  
Henry Rusinek, PhD – Past Investigator  
Mony J de Leon, EdD – Past Investigator  
Lidia Glodzik, MD, PhD – Past Investigator  
Susan De Santi, PhD – Past Investigator

**Duke University Medical Center:**

P. Murali Doraiswamy, MD  
Jeffrey R. Petrella, MD  
Terence Z. Wong, MD

**University of Pennsylvania:**

Steven E. Arnold, MD  
Jason H. Karlawish, MD  
David Wolk, MD

**University of Kentucky:**

Charles D. Smith, MD  
Greg Jicha, MD  
Peter Hardy, PhD  
Partha Sinha, PhD  
Elizabeth Oates, MD  
Gary Conrad, MD

**University of Pittsburgh:**

Oscar L. Lopez, MD  
MaryAnn Oakley, MA  
Donna M. Simpson, CRNP, MPH

**University of Rochester Medical Center:**

Anton P. Porsteinsson, MD  
Bonnie S. Goldstein, MS, NP  
Kim Martin, RN  
Kelly M. Makino, BS – Past Investigator  
M. Saleem Ismail, MD – Past Investigator  
Connie Brand, RN – Past Investigator

**University of California, Irvine:**

Ruth A. Mulnard, DNSc, RN, FAAN  
Gaby Thai, MD  
Catherine Mc-Adams-Ortiz, MSN, RN, A/GNP

**University of Texas Southwestern Medical School:**

Kyle Womack, MD  
Dana Mathews, MD, PhD  
Mary Quiceno, MD  
Ramon Diaz-Arrastia, MD, PhD – Past Investigator

Richard King, MD – Past Investigator  
Myron Weiner, MD – Past Investigator  
Kristen Martin-Cook, MA – Past Investigator  
Michael DeVous, PhD – Past Investigator

**Emory University:**

Allan I. Levey, MD, PhD  
James J. Lah, MD, PhD  
Janet S. Cellar, DNP, PMHCNS-BC

**University of Kansas, Medical Center:**

Jeffrey M. Burns, MD  
Heather S. Anderson, MD  
Russell H. Swerdlow, MD

**University of California, Los Angeles:**

Liana Apostolova, MD  
Kathleen Tingus, PhD  
Ellen Woo, PhD  
Daniel H.S. Silverman, MD, PhD  
Po H. Lu, PsyD – Past Investigator  
George Bartzokis, MD – Past Investigator

**Mayo Clinic, Jacksonville:**

Neill R Graff-Radford, MBBCH, FRCP (London)  
Francine Parfitt, MSH, CCRC  
Tracy Kendall, BA, CCRP  
Heather Johnson, MLS, CCRP – Past Investigator

**Indiana University:**

Martin R. Farlow, MD  
Ann Marie Hake, MD  
Brandy R. Matthews, MD  
Scott Herring, RN, CCRC  
Cynthia Hunt, BS, CCRP

**Yale University School of Medicine:**

Christopher H. van Dyck, MD  
Richard E. Carson, PhD  
Martha G. MacAvoy, PhD

**McGill Univ., Montreal-Jewish General Hospital:**

Howard Chertkow, MD  
Howard Bergman, MD  
Chris Hosein, MEd



**Sunnybrook Health Sciences, Ontario:**

Sandra Black, MD, FRCPC  
Dr Bojana Stefanovic  
Curtis Caldwell, PhD

**U.B.C. Clinic for AD & Related Disorders:**

Ging-Yuek Robin Hsiung, MD, MHSc, FRCPC  
Howard Feldman, MD, FRCPC  
Benita Mudge, BS  
Michele Assaly, MA – Past

**Cognitive Neurology - St. Joseph's, Ontario:**

Andrew Kertesz, MD  
John Rogers, MD  
Dick Trost, PhD

**Cleveland Clinic Lou Ruvo Center for Brain Health:**

Charles Bernick, MD  
Donna Munic, PhD

**Northwestern University:**

Diana Kerwin, MD  
Marek-Marsel Mesulam, MD  
Kristine Lipowski, BA  
Chuang-Kuo Wu, MD, PhD – Past Investigator  
Nancy Johnson, PhD – Past Investigator

**Premiere Research Inst (Palm Beach Neurology):**

Carl Sadowsky, MD  
Walter Martinez, MD  
Teresa Villena, MD

**Georgetown University Medical Center:**

Raymond Scott Turner, MD, PhD  
Kathleen Johnson, NP  
Brigid Reynolds, NP

**Brigham and Women's Hospital:**

Reisa A. Sperling, MD  
Keith A. Johnson, MD  
Gad Marshall, MD  
Meghan Frey – Past Investigator

**Stanford University:**

Jerome Yesavage, MD  
Joy L. Taylor, PhD

Barton Lane, MD

Allyson Rosen, PhD – Past Investigator  
Jared Tinklenberg, MD – Past Investigator

**Banner Sun Health Research Institute:**

Marwan N. Sabbagh, MD  
Christine M. Belden, PsyD  
Sandra A. Jacobson, MD  
Sherye A. Sirrel, MS

**Boston University:**

Neil Kowall, MD  
Ronald Killiany, PhD  
Andrew E. Budson, MD  
Alexander Norbash, MD – Past Investigator  
Patricia Lynn Johnson, BA – Past Investigator

**Howard University:**

Thomas O. Obisesan, MD, MPH  
Saba Wolday, MSc  
Joanne Allard, PhD

**Case Western Reserve University:**

Alan Lerner, MD  
Paula Ogrocki, PhD  
Leon Hudson, MPH – Past Investigator

**University of California, Davis – Sacramento:**

Evan Fletcher, PhD  
Owen Carmichael, PhD  
John Olichney, MD  
Charles DeCarli, MD – Past Investigator

**Neurological Care of CNY:**

Smita Kittur, MD

**Parkwood Hospital:**

Michael Borrie, MB ChB  
T-Y Lee, PhD  
Dr Rob Bartha, PhD

**University of Wisconsin:**

Sterling Johnson, PhD  
Sanjay Asthana, MD  
Cynthia M. Carlsson, MD

**University of California, Irvine - BIC:**

Steven G. Potkin, MD



Adrian Preda, MD  
Dana Nguyen, PhD

**Banner Alzheimer's Institute:**

Pierre Tariot, MD  
Adam Fleisher, MD  
Stephanie Reeder, BA

**Dent Neurologic Institute:**

Vernice Bates, MD  
Horacio Capote, MD  
Michelle Rainka, PharmD, CCRP

**Ohio State University:**

Douglas W. Scharre, MD  
Maria Kataki, MD, PhD  
Anahita Adeli, MD

**Albany Medical College:**

Earl A. Zimmerman, MD  
Dzintra Celmins, MD  
Alice D. Brown, FNP

**Hartford Hospital, Olin Neuropsychiatry  
Research Center:**

Godfrey D. Pearlson, MD  
Karen Blank, MD  
Karen Anderson, RN

**Dartmouth-Hitchcock Medical Center:**

Robert B. Santulli, MD  
Tamar J. Kitzmiller  
Eben S. Schwartz, PhD – Past Investigator

**Wake Forest University Health Sciences:**

Kaycee M. Sink, MD, MAS  
Jeff D. Williamson, MD, MHS  
Pradeep Garg, PhD  
Franklin Watkins, MD – Past Investigator

**Rhode Island Hospital:**

Brian R. Ott, MD  
Henry Querfurth, MD

Geoffrey Tremont, PhD

**Butler Hospital:**

Stephen Salloway, MD, MS  
Paul Malloy, PhD  
Stephen Correia, PhD

**UC San Francisco:**

Howard J. Rosen, MD  
Bruce L. Miller, MD

**Medical University South Carolina:**

Jacobo Mintzer, MD, MBA  
Kenneth Spicer, MD, PhD  
David Bachman, MD

**St. Joseph's Health Care:**

Elizabeth Finger, MD  
Stephen Pasternak, MD  
Irina Rachinsky, MD  
John Rogers, MD  
Andrew Kertesz, MD – Past Investigator  
Dick Drost, MD – Past Investigator

**Nathan Kline Institute**

Nunzio Pomara, MD  
Raymundo Hernando, MD  
Antero Sarrael, MD

**University of Iowa College of Medicine**

Susan K. Schultz, MD  
Laura L. Boles Ponto, PhD  
Hyungsub Shim, MD  
Karen Elizabeth Smith, RN

**Cornell University**

Norman Relkin, MD, PhD  
Gloria Chaing, MD  
Lisa Raudin, PhD

**University of South Florida: USF Health Byrd  
Alzheimer's Institute**

Amanda Smith, MD  
Kristin Fargher, MD  
Balebail Ashok Raj, MD

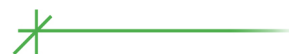



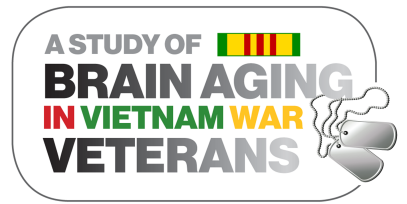

## II. DOD ADNI

### Part A: Leadership and Infrastructure

#### **Principal Investigator**

Michael W. Weiner, MD

University of California, San Francisco

#### **ADCS PI and Director of Coordinating Center Clinical Core**

Paul Aisen, MD

UC San Diego

#### **Executive Committee**

Michael Weiner, MD

UC San Francisco

Paul Aisen, MD

UC San Diego

Ronald Petersen, MD, PhD

Mayo Clinic, Rochester

Robert C. Green, MD, MPH

Brigham and Women's Hospital/  
Harvard Medical School

Danielle Harvey, PhD

UC Davis

Clifford R. Jack, Jr., MD

Mayo Clinic, Rochester

William Jagust, MD

UC Berkeley

John C. Morris, MD

Washington University St. Louis

Andrew J. Saykin, PsyD

Indiana University

Leslie M. Shaw, PhD

Perelman School of Medicine, UPenn

Arthur W. Toga, PhD

USC

John Q. Trojanowki, MD, PhD

Perelman School of Medicine, University of Pennsylvania

#### **Psychological Evaluation/PTSD Core**

Thomas Neylan, MD

UC San Francisco

#### **Traumatic Brain Injury/TBI Core**

Jordan Grafman, PhD

Rehabilitation Institute of Chicago, Feinberg School of Medicine,  
Northwestern University

#### **Data and Publication Committee (DPC)**

Robert C. Green, MD, MPH

BWH/HMS (Chair)

#### **Resource Allocation Review Committee**

Tom Montine, MD, PhD

University of Washington (Chair)

#### **Clinical Core Leaders**

Michael Weiner MD

Core PI

Ronald Petersen, MD, PhD

Mayo Clinic, Rochester (Core PI)

Paul Aisen, MD

UC San Diego

#### **Clinical Informatics and Operations**

Ronald G. Thomas, PhD

UC San Diego

Michael Donohue, PhD

UC San Diego

Devon Gessert

UC San Diego

Tamie Sather, MA

UC San Diego

Melissa Davis

UC San Diego

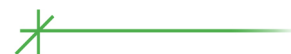



Rosemary Morrison, MPH  
Gus Jiminez, MBS

UC San Diego  
UC San Diego

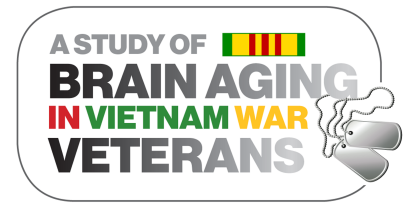

**San Francisco Veterans Affairs Medical Center**

Thomas Neylan, MD UC San Francisco  
Jacqueline Hayes UC San Francisco  
Shannon Finley UC San Francisco

**Biostatistics Core Leaders and Key Personnel**

Danielle Harvey, PhD UC Davis (Core PI)  
Michael Donohue, PhD UC San Diego

**MRI Core Leaders and Key Personnel**

Clifford R. Jack, Jr., MD Mayo Clinic, Rochester (Core PI)  
Matthew Bernstein, PhD Mayo Clinic, Rochester  
Bret Borowski, RT Mayo Clinic  
Jeff Gunter, PhD Mayo Clinic  
Matt Senjem, MS Mayo Clinic  
Kejal Kantarci Mayo Clinic  
Chad Ward Mayo Clinic

**PET Core Leaders and Key Personnel**

William Jagust, MD UC Berkeley (Core PI)  
Robert A. Koeppe, PhD University of Michigan  
Norm Foster, MD University of Utah  
Eric M. Reiman, MD Banner Alzheimer's Institute  
Kewei Chen, PhD Banner Alzheimer's Institute  
Susan Landau, PhD UC Berkeley

**Neuropathology Core Leaders**

John C. Morris, MD Washington University St. Louis  
Nigel J. Cairns, PhD, FRCPath Washington University St. Louis  
Erin Householder, MS Washington University St. Louis

**Biomarkers Core Leaders and Key Personnel**

Leslie M. Shaw, PhD Perelman School of Medicine, UPenn  
John Q. Trojanowki, MD, PhD Perelman School of Medicine, UPenn  
Virginia Lee, PhD, MBA Perelman School of Medicine, UPenn  
Magdalena Korecka, PhD Perelman School of Medicine, UPenn  
Michal Figurski, PhD Perelman School of Medicine, UPenn

**Informatics Core Leaders and Key Personnel**

Arthur W. Toga, PhD USC (Core PI)  
Karen Crawford USC  
Scott Neu, PhD USC

**Genetics Core Leaders and Key Personnel**

Andrew J. Saykin, PsyD Indiana University



Tatiana M. Foroud, PhD  
Steven Potkin, MD UC  
Li Shen, PhD  
Kelley Faber, MS, CCRC  
Sungeun Kim, PhD  
Kwangsik Nho, PhD

Indiana University  
UC Irvine  
Indiana University  
Indiana University  
Indiana University  
Indiana University

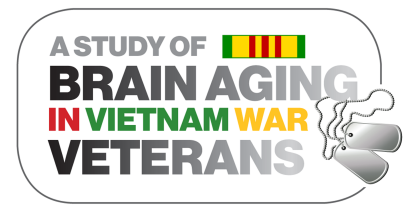

### **Initial Concept Planning & Development**

Michael W. Weiner, MD  
Karl Friedl

UC San Francisco  
Department of Defense (retired)

### **Part B: Investigators By Site**

#### **University of Southern California:**

Lon S. Schneider, MD, MS  
Sonia Pawluczyk, MD  
Mauricio Beccera

#### **University of California, San Diego:**

James Brewer, MD, PhD  
Helen Vanderswag, RN

#### **Columbia University Medical Center:**

Yaakov Stern, PhD  
Lawrence S. Honig, MD, PhD  
Karen L. Bell, MD

#### **Rush University Medical Center:**

Debra Fleischman, Ph.D.  
Konstantinos Arfanakis, Ph.D.  
Raj C. Shah, M.D.

#### **Wien Center:**

Dr. Ranjan Duara MD PI  
Dr. Daniel Varon MD Co-PI  
Maria T Greig HP Coordinator

#### **Duke University Medical Center:**

P. Murali Doraiswamy, MBBS  
Jeffrey R. Petrella, MD  
Olga James, MD

#### **University of Rochester Medical Center:**

Anton P. Porsteinsson, MD (director)  
Bonnie Goldstein, MS, NP (coordinator)  
Kimberly S. Martin, RN

#### **University of California, Irvine:**

Ruth A. Mulnard, DNSc, RN, FAAN  
Gaby Thai, MD  
Catherine McAdams-Ortiz, MSN, RN, A/GNP

#### **Medical University South Carolina:**

Jacobo Mintzer, MD, MBA  
Dino Massoglia, MD, PhD  
Olga Brawman-Mintzer, MD

#### **Premiere Research Inst (Palm Beach Neurology):**

Carl Sadowsky, MD  
Walter Martinez, MD  
Teresa Villena, MD

#### **University of California, San Francisco:**

William Jagust MD  
Susan Landau PhD

#### **Georgetown University Medical Center:**

Raymond Scott Turner, MD, PhD  
Kelly Behan  
Brigid Reynolds, NP

#### **Brigham and Women's Hospital:**

Reisa A. Sperling, MD  
Keith A. Johnson, MD  
Gad Marshall, MD

#### **Banner Sun Health Research Institute:**

Marwan N. Sabbagh, MD  
Sandra A. Jacobson, MD  
Sherye A. Sirrel, MS, CCRC



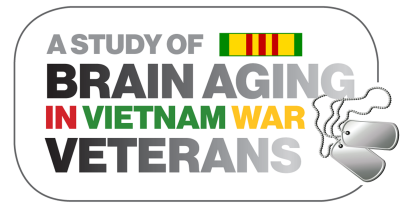

**Howard University:**

Thomas O. Obisesan, MD, MPH  
Saba Wolday, MSc  
Joanne Allard, PhD

**University of Wisconsin:**

Sterling C. Johnson, Ph.D.  
J. Jay Fruehling, M.A.  
Sandra Harding, M.S.

**University of Washington:**

Elaine R. Peskind, MD  
Eric C. Petrie, MD, MS  
Gail Li, MD, PhD

**Stanford University:**

Jerome A. Yesavage, MD  
Joy L. Taylor, PhD  
Ansgar J. Furst, PhD

**Cornell University:**

Norman Relkin, MD, PhD  
Gloria Chaing, MD  
Lisa Ravdin, PhD

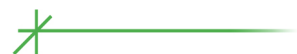

Supplement: MOESM2 [file 11910078]
